# Supplementary material for: Pregnane-Type Steroids from the Formosan Soft Coral Scleronephthya flexilis
Source: PubMed Central journal article supplement (PMC4100144; doi:10.3390/ijms150610136), 2014-06-06

# Supplementary Information

Figure S1.  $^1\text{H}$  NMR spectrum (700 MHz) of compound **1** in  $\text{CDCl}_3$ .

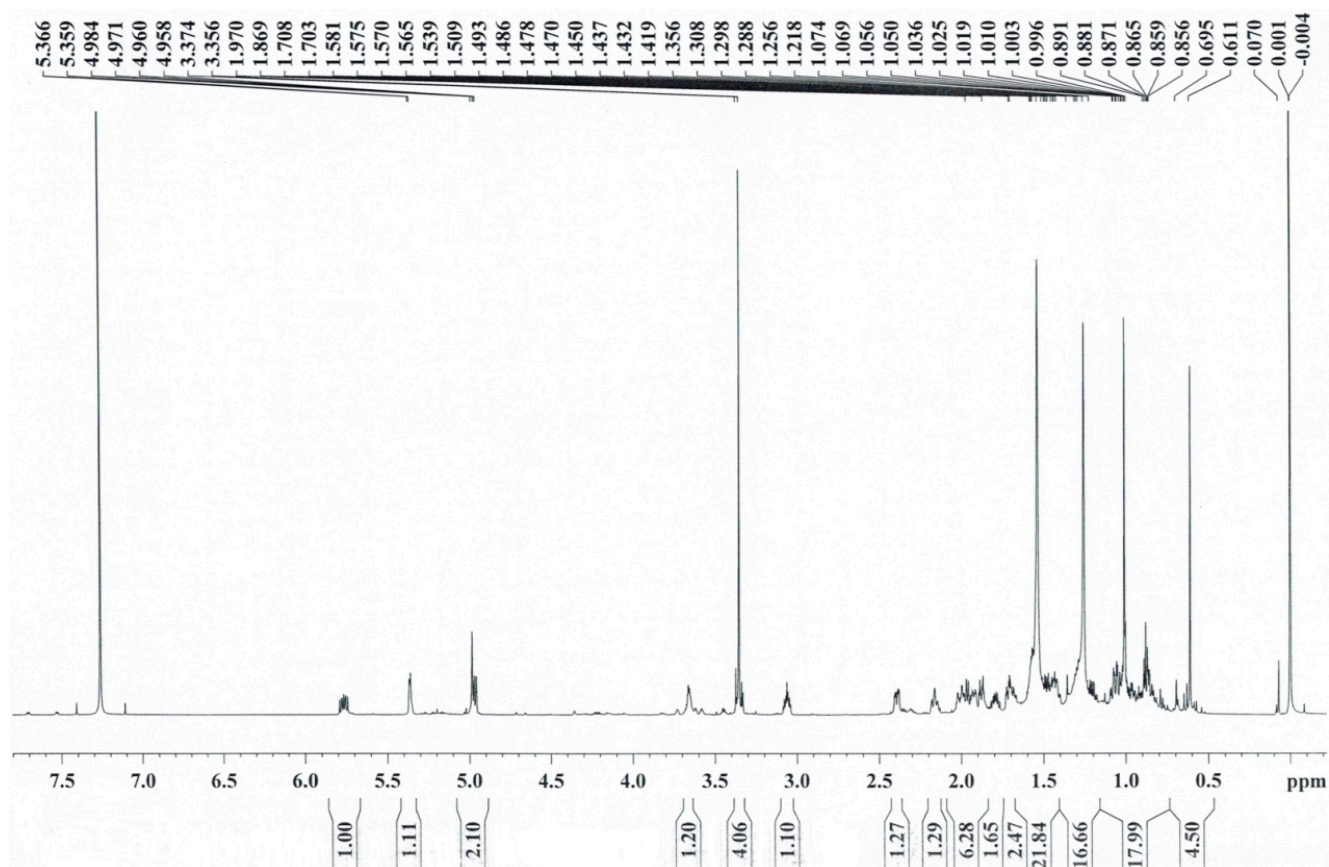

**Figure S2.**  $^{13}\text{C}$  NMR spectrum (175 MHz) of compound **1** in  $\text{CDCl}_3$ .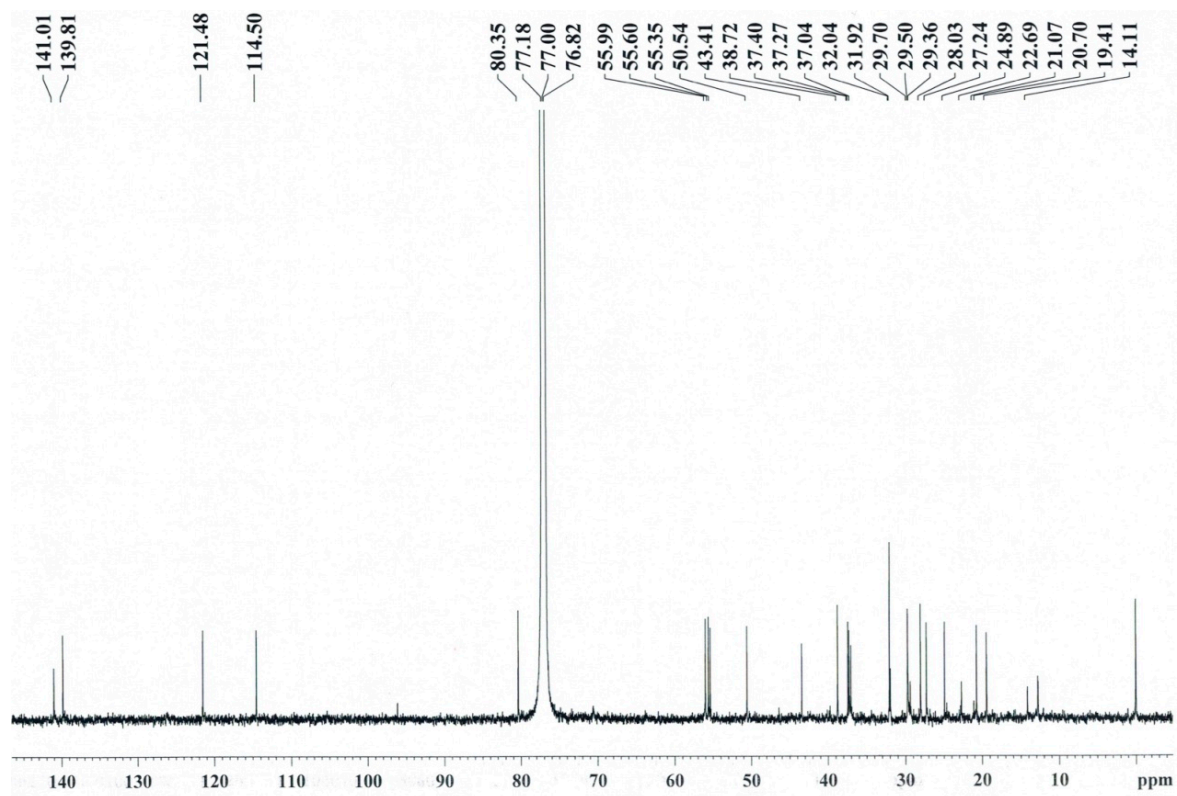**Figure S3.** DEPT spectrum (700 MHz) of compound **1** in  $\text{CDCl}_3$ .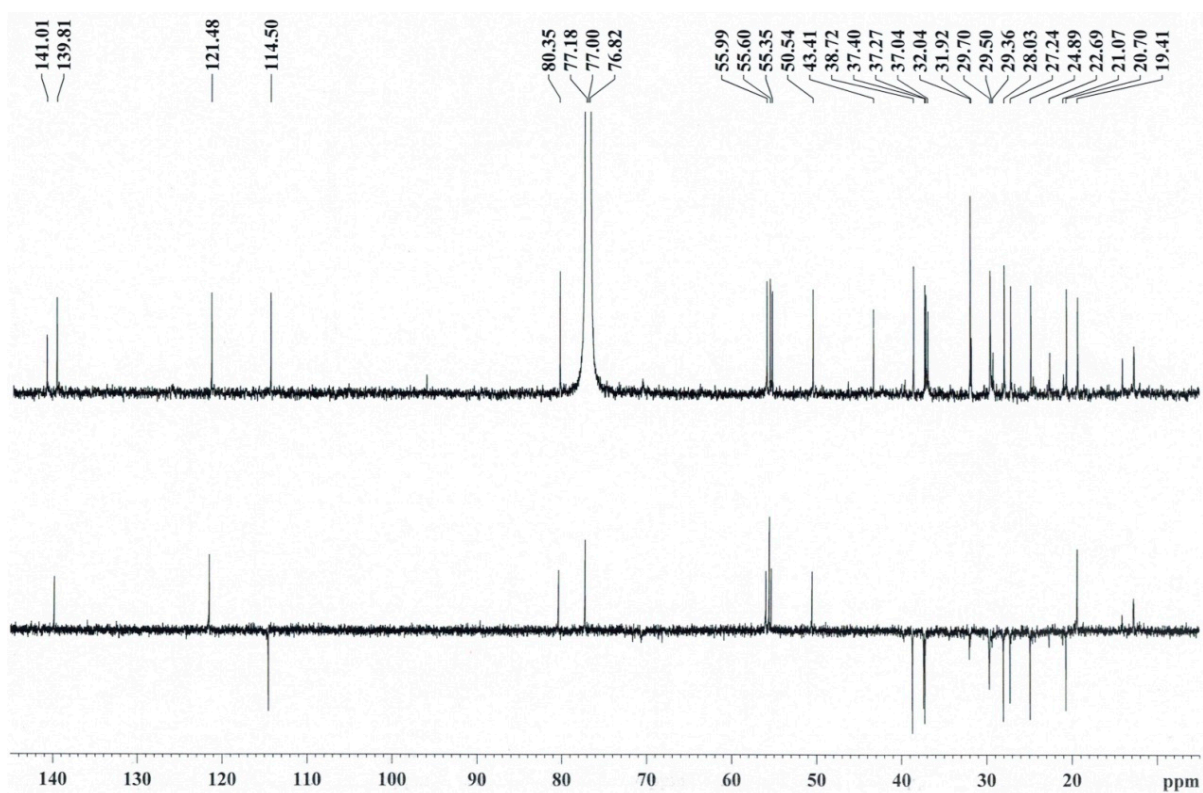

Figure S4. HSQC spectrum (700 MHz) of compound 1 in CDCl<sub>3</sub>.

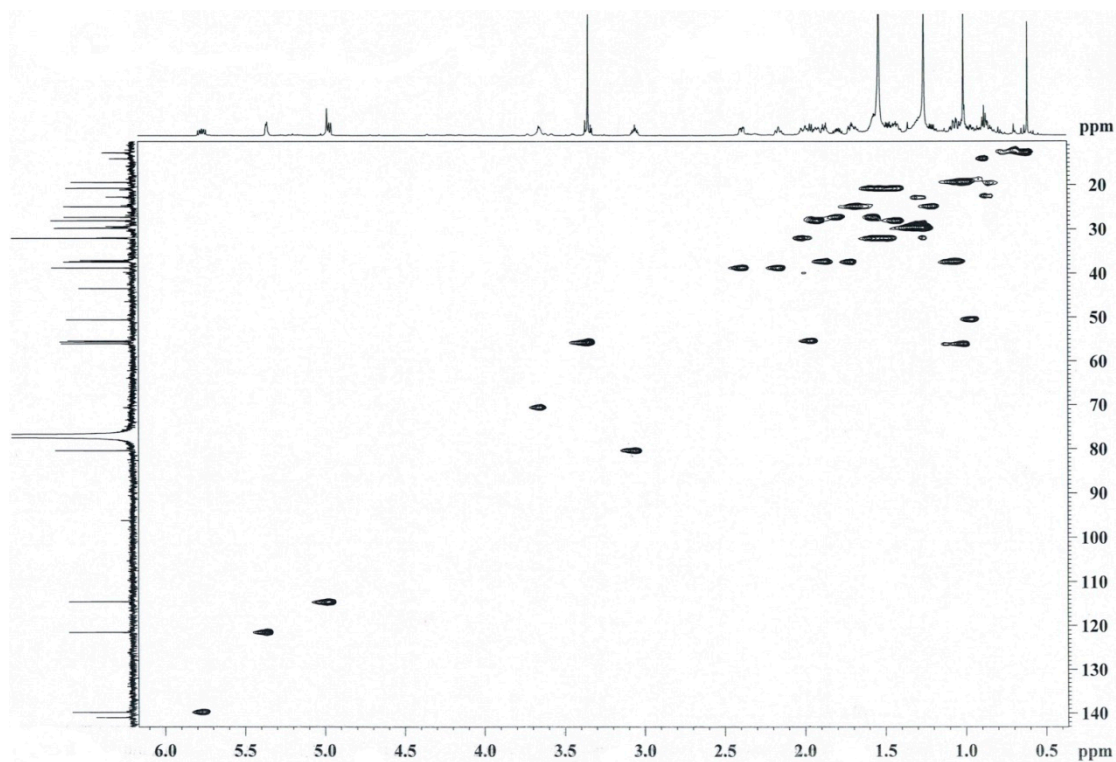

Figure S5. HMBC spectrum (700 MHz) of compound 1 in CDCl<sub>3</sub>.

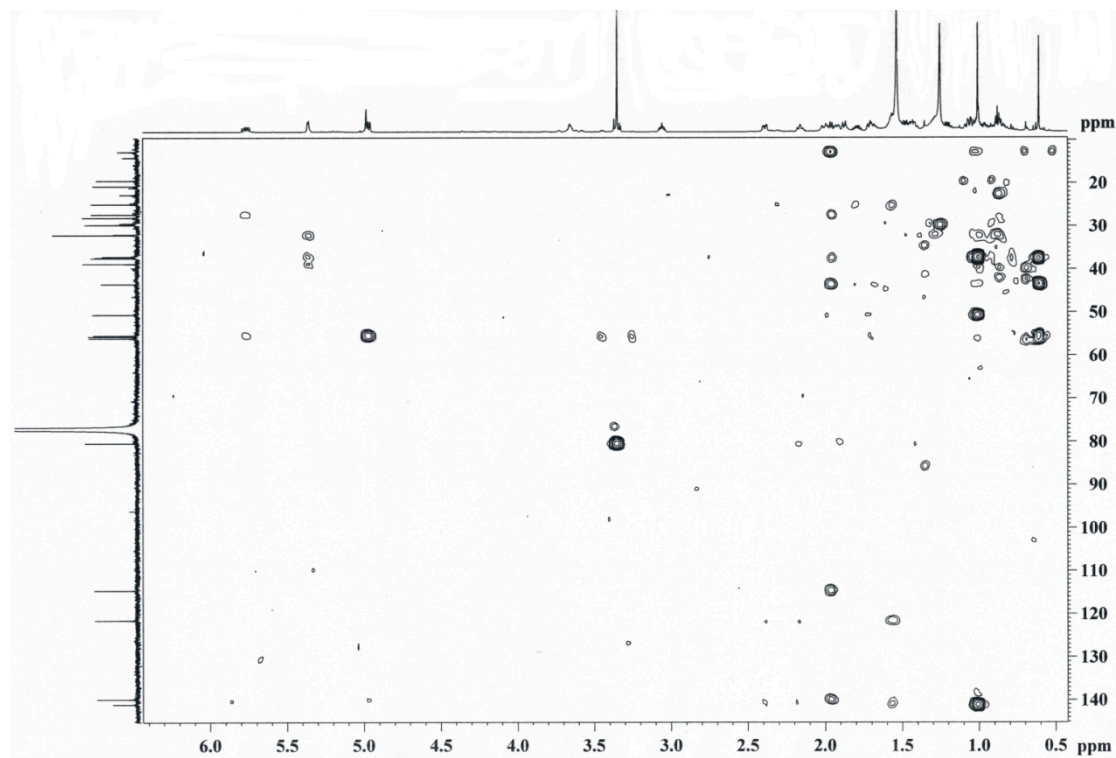



Figure S6. COSY spectrum (700 MHz) of compound 1 in CDCl<sub>3</sub>.

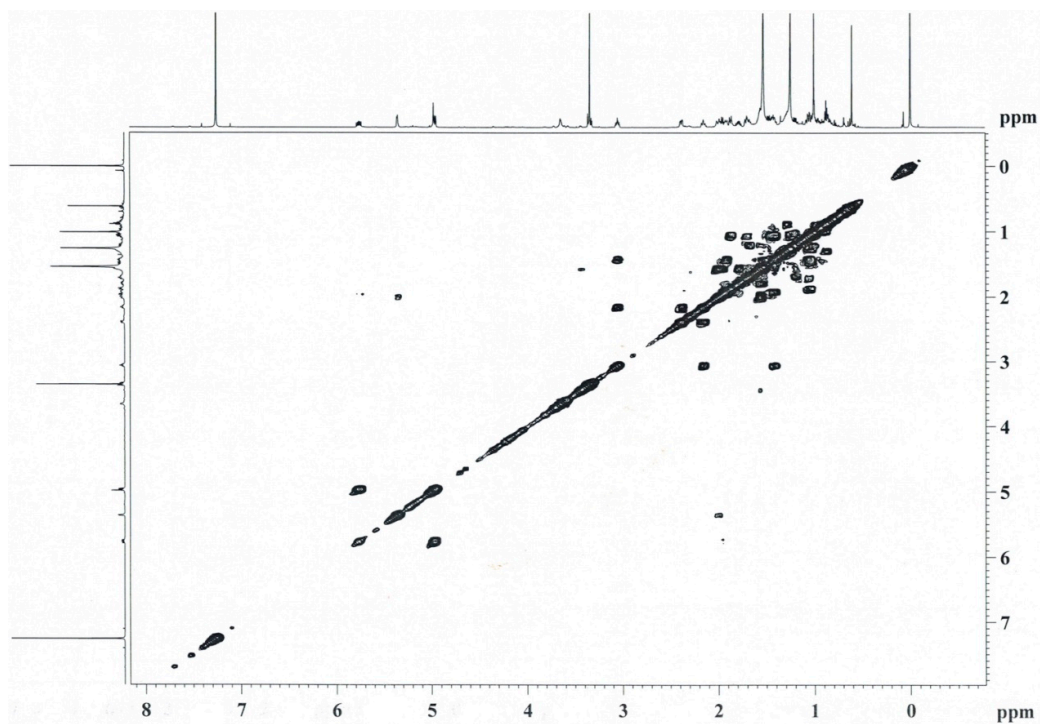

Figure S7. NOESY spectrum (700 MHz) of compound 1 in CDCl<sub>3</sub>.

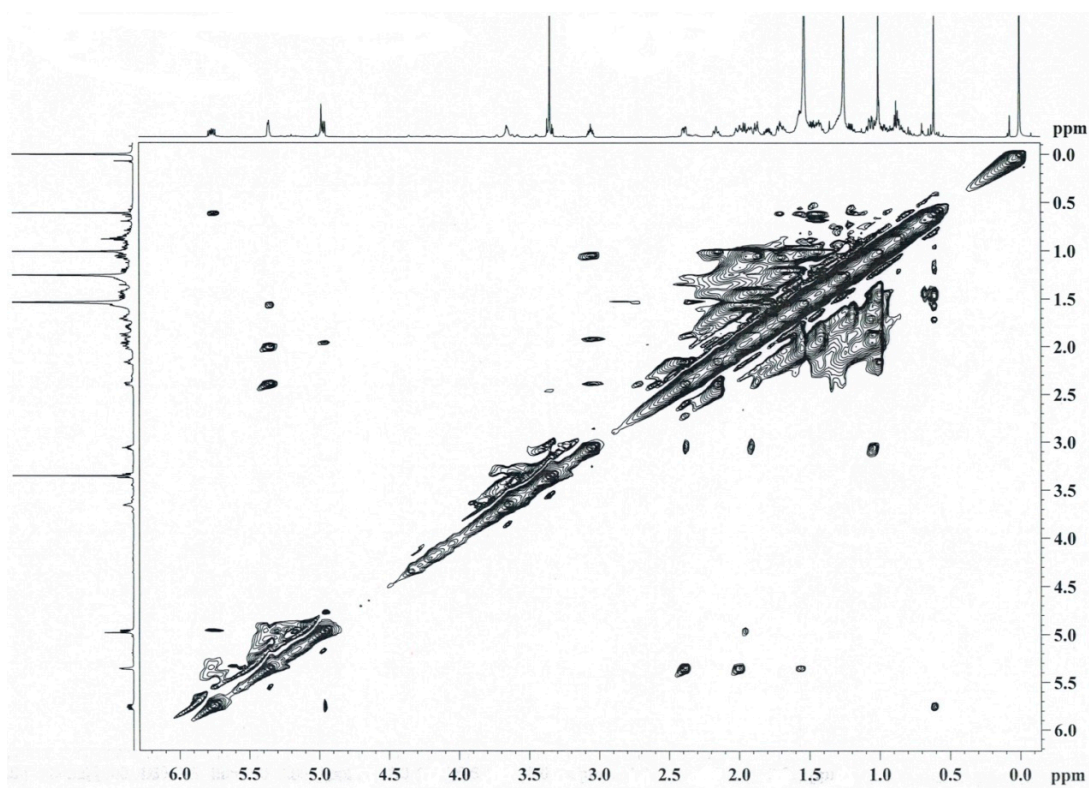

Supplement: ijms-15-10136-s001.pdf [file ijms-15-10136-s001.pdf]
